# Supplementary material for: A highly selective, Hg2+ triggered hydrogelation: modulation of morphology by chemical stimuli
Source: Royal Society of Chemistry journal article supplement (doi:10.1039/c3cc47591c), 2013-11-11
Supplement: c3cc47591c.pdf [file c3cc47591c.pdf]

# A Highly Selective, Hg<sup>2+</sup> Triggered Hydrogelation: Modulation of Morphology by Chemical Stimuli

Biswa Nath Ghosh,<sup>‡a</sup> Sandip Bhowmik,<sup>‡a</sup> Prasenjit Mal<sup>\*b</sup> and Kari Rissanen<sup>\*a</sup>

<sup>a</sup>Department of Chemistry, Nanoscience Center, University of Jyväskylä, P.O. Box 35, 40014 Jyväskylä, Finland. Fax: +358 14 2602501; Tel: 358-50-5623721; E-mail: kari.t.rissanen@jyu.fi

<sup>b</sup>School of Chemical Sciences, National Institute of Science Education and Research (NISER) Bhubaneswar; Institute of Physics Campus, P.O. Sainik School; Bhubaneswar, Odisha 751 005, India.

<sup>‡</sup>These authors contributed equally to this work.

## EXPERIMENTAL SECTION

### Materials and physical methods

Unless stated otherwise, all reagents and solvents were purchased from Aldrich chemicals and used without further purification. The starting compound 4'-(4-bromophenyl)-2,2':6',2''-terpyridine **1** needed for the synthesis of **L** and **L1** was synthesized following the literature method.<sup>1</sup> The ligand 4'-[4-(4-phenyl)phenyl]-2,2':6',2''-terpyridine **L1** was synthesized according to the literature procedure.<sup>2</sup> The synthesis details of **L** are given below. The NMR spectra (<sup>1</sup>H, <sup>13</sup>C) for **L** were recorded at 300 K on a Bruker Avance DRX500 NMR spectrometer, operating at 500 MHz for proton and 125 MHz for carbon using CDCl<sub>3</sub> as solvent. Mass spectrum was recorded on a Micromas (ESI-TOF) spectrometer.

### Synthesis of 4'-[4-(4-aminophenyl)phenyl]-2,2':6',2''-terpyridine **L**

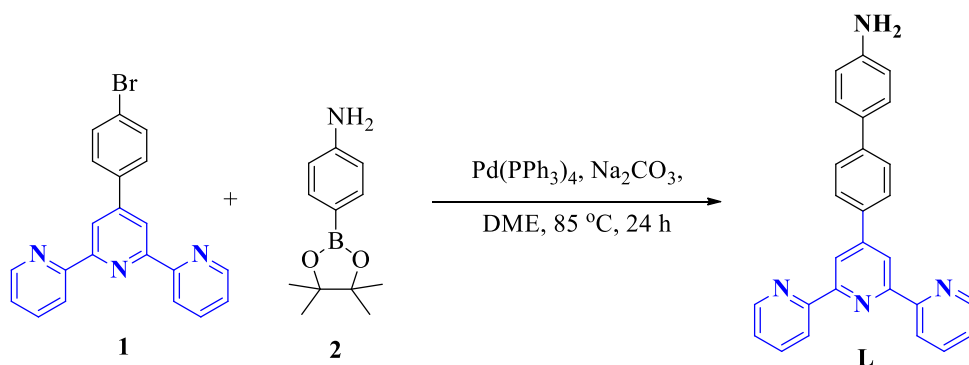

4'-(4-bromophenyl)-2,2':6',2''-terpyridine **1** (389 mg, 1.0 mmol), 4-aminophenylboronic acid pinacol ester (241 mg, 1.1 mmol, 1.1 equiv.) and dimethoxymethane (15 mL) were placed in an oven-dried Schlenk tube and the solution was degassed and then placed under argon. Sodium carbonate (320 mg, 3 mmol) was dissolved in 6 mL water in a separate Schlenk and degassed similarly. The catalyst, [Pd(PPh<sub>3</sub>)<sub>4</sub>], (50 mg, 0.043 mmol, 0.043 equiv.) was added to the first Schlenk, followed immediately by the sodium carbonate solution. After stirring the solution at room temperature for 1 h, the temperature was increased to 85 °C for 24 h. After cooling down, the solution was diluted with dichloromethane and filtered over celite. The filtrate washed with saturated NH<sub>4</sub>Cl, brine, dried (MgSO<sub>4</sub>) and evaporated to get the crude product **L**. The crude product was purified by Column chromatography (25% ethyl acetate in n-hexane) and then recrystallized from boiling ethanol solution. Yield 74%. <sup>1</sup>H NMR (500 MHz, CDCl<sub>3</sub>) δ/ppm: 8.79 (s, 2H), 8.75 (m, 2H), 8.68 (dt, 2H, *J* = 1.0 Hz, 7.9 Hz), 7.97 (dt, 2H, *J* = 2.0 Hz, 8.5 Hz), 7.88 (m, 2H), 7.69 (dt, 2H, *J* = 2.0 Hz, 8.5 Hz), 7.51 (dt, 2H, *J* = 2.0 Hz, 8.6 Hz), 7.36 (m, 2H), 6.79 (dt, 2H, *J* = 2.0 Hz, 8.6 Hz), 3.78 (s, 2H). <sup>13</sup>C NMR (125 MHz, CDCl<sub>3</sub>) δ/ppm: 156.58, 156.13, 150.08, 149.31, 146.39, 142.00, 136.98, 136.33, 130.83, 128.18, 127.78, 126.88, 123.92, 121.53, 118.76, 115.58. HRMS (ESI-TOF) *m/z* [M+Na]<sup>+</sup> calcd for (C<sub>27</sub>H<sub>20</sub>N<sub>4</sub>Na<sup>+</sup>) 423,1580; found: 423,1597.

**NMR characterization of L1:** <sup>1</sup>H NMR (CDCl<sub>3</sub>, 300 MHz): δ 8.81 (s, 2H), 8.75 (d, 2H, *J* = 3.8 Hz), 8.69 (d, 2H, *J* = 8.0 Hz), 8.01 (d, 2H, *J* = 8.3 Hz), 7.89 (td, 2H, *J* = 1.8, 7.8 Hz), 7.75 (d, 2H, *J* = 8.2 Hz), 7.68 (d, 2H, *J* = 7.1 Hz), 7.49 (t, 2H, *J* = 7.2 Hz), 7.37 (m, 3H). <sup>13</sup>C NMR (CDCl<sub>3</sub>, 75 MHz): δ 156.48, 156.17, 149.93, 149.31, 142.02, 140.61, 137.48, 137.00, 129.02, 127.88, 127.76, 127.29, 123.96, 121.53, 118.87.

**Gelation studies of L with MCl<sub>2</sub> salts (M = Mg, Ca, Mn, Fe, Co, Ni, Cu, Zn, Cd, Hg):** To a stock solution of **L** (400 μL, 8.25 mM in 0.15 N HCl) taken in a test tube (0.5 cm diameter), 120 μL of MCl<sub>2</sub> (55 mM in H<sub>2</sub>O) was added from top and shaken gently to allow homogeneous mixing. Addition of Hg<sup>2+</sup> produced a gel almost instantaneously whereas other divalent metal cations produced colored precipitates within 5-10 minutes (except for Zn<sup>2+</sup> where precipitate was obtained after ~24 hrs). Addition of Cu<sup>2+</sup> immediately produced brown gelatinous precipitate which then quickly turned to green precipitate (within 2-3 minutes).

**Gelation studies with water soluble  $\text{HgX}_2$  salts ( $\text{X} = \text{NO}_3, \text{ClO}_4$ ):** To a stock solution of **L** (400  $\mu\text{L}$ , 8.25 mM in 0.15 N HCl) taken in a test tube (0.5 cm diameter), 120  $\mu\text{L}$  of  $\text{HgX}_2$  (55 mM in  $\text{H}_2\text{O}$ ) was added and shaken gently. While  $\text{Hg}(\text{NO}_3)_2$  also showed similar gelation behavior, addition of  $\text{Hg}(\text{ClO}_4)_2$  to the solution of **L** resulted in a precipitate.

We also tried different mineral acids for the initial solubilization of the ligand **L**. **L** could not be solubilized in 0.2 N  $\text{H}_2\text{SO}_4$  or  $\text{HClO}_4$  even at lower concentrations ( $< 5$  mM) and was only soluble in 0.2 N  $\text{HNO}_3$  at elevated temperature ( $> 80$   $^\circ\text{C}$ ). However, addition of  $\text{HgCl}_2$  in a hot, 0.2 N  $\text{HNO}_3$  solution of **L** initially resulted in a clear solution that eventually turned into precipitate upon standing for long time (Fig. S1).

**Gelation studies of **L1** with  $\text{HgCl}_2$ :** To a stock solution of **L1** (400  $\mu\text{L}$ , 8.25 mM in 0.15 N HCl), addition of 120  $\mu\text{L}$  of  $\text{HgCl}_2$  (55 mM in  $\text{H}_2\text{O}$ ) solution resulted precipitation of the complex (Fig. S1).

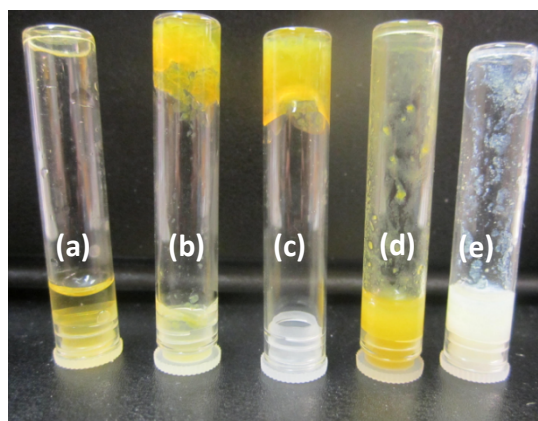

**Fig. S1** 6 mM of **L** in presence of (a) 12 mM  $\text{HgCl}_2$  in 0.2 M  $\text{HNO}_3$ , (b) 12 mM  $\text{Hg}(\text{NO}_3)_2$  in 0.2 M HCl, (c) 12 mM  $\text{HgCl}_2$  in 0.2 M HCl, (d) 12 mM  $\text{Hg}(\text{ClO}_4)_2$  in 0.2 M HCl and (e) 6 mM of **L1** in presence of 12 mM  $\text{HgCl}_2$  in 0.2 M HCl.

**Gelation study with  $\text{Hg}^{2+}$  in presence of other metal ions:** To a stock solution of **L** (400  $\mu\text{L}$ , 8.25 mM in 0.15 N HCl) taken in a test tube (0.5 cm diameter), a mixture of 60  $\mu\text{L}$  of  $\text{M}^{2+}$  (55 mM  $\text{Zn}^{2+}/\text{Cu}^{2+}/\text{Ni}^{2+}$ ) and 60  $\mu\text{L}$  of  $\text{Hg}^{2+}$  (55 mM in  $\text{H}_2\text{O}$ ) was added and allowed to stand after gentle shaking. It was observed while presence of  $\text{Cu}^{2+}$  and  $\text{Ni}^{2+}$  severely disturbed the gelation process, presence of  $\text{Zn}^{2+}$  resulted in a partial gel (Fig. S2).

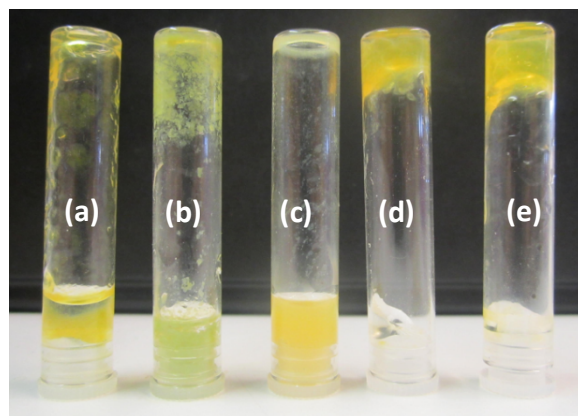

**Fig. S2** 6 mM of **L** in presence of 6 mM/6mM of a)  $\text{Zn}^{2+}/\text{Hg}^{2+}$ , b)  $\text{Cu}^{2+}/\text{Hg}^{2+}$ , c)  $\text{Ni}^{2+}/\text{Hg}^{2+}$ , d) 6 mM  $\text{Hg}^{2+}$  and e) 12 mM  $\text{Hg}^{2+}$ .

### X-ray crystallographic details

Yellow plate like crystals of  $\text{HgCl}_2\text{L}$  were grown by slow evaporation of its DMF solution at room temperature and single crystal X-ray diffraction analysis was performed on Bruker-Nonius Kappa CCD diffractometer equipped with APEX II detector. Unit cell refinement and data reduction were carried out using the programme *DENZO-SMN*.<sup>3</sup> Absorption correction was done using the *SADABS*<sup>4</sup> programme. The structure was solved by the programme *SIR-2002*<sup>5</sup> and refined by full-matrix least squares on  $F^2$  using the WinGX<sup>6</sup> software, which utilizes the *SHELXL-97* module.<sup>7</sup> All non-hydrogen atoms were refined with anisotropic thermal parameters. Hydrogen atoms were introduced in proper positions with isotropic thermal parameters using the 'riding model'. The figures were drawn using *Ortep-3 for Windows*<sup>8</sup> and *Mercury v 2.3* programmes.<sup>9</sup>

**Table S1.** Crystallographic data and structure refinement parameters for **HgCl<sub>2</sub>L**

|                                              |                                                                                                                                                           |
|----------------------------------------------|-----------------------------------------------------------------------------------------------------------------------------------------------------------|
| CCDC No.                                     | 960506                                                                                                                                                    |
| Empirical formula                            | C <sub>27</sub> H <sub>20</sub> N <sub>4</sub> Cl <sub>2</sub> Hg <sub>1</sub>                                                                            |
| Formula weight                               | 671.96                                                                                                                                                    |
| Temperature                                  | 123.0(1) K                                                                                                                                                |
| Wavelength                                   | 0.71073 Å                                                                                                                                                 |
| Crystal color and shape                      | yellow, plate                                                                                                                                             |
| Crystal size                                 | 0.52 x 0.18 x 0.02 mm <sup>3</sup>                                                                                                                        |
| Crystal system                               | triclinic                                                                                                                                                 |
| Space group                                  | P-1                                                                                                                                                       |
| Unit cell dimensions                         | $a = 9.2217(10)$ Å<br>$b = 10.8168(12)$ Å<br>$c = 13.0876(17)$ Å<br>$\alpha = 75.035(5)^\circ$<br>$\beta = 69.904(6)^\circ$<br>$\gamma = 83.819(7)^\circ$ |
| <i>V</i>                                     | 1184.2(2) Å <sup>3</sup>                                                                                                                                  |
| <i>Z</i>                                     | 2                                                                                                                                                         |
| Density (calculated)                         | 1.885 Mg/m <sup>3</sup>                                                                                                                                   |
| Absorption coefficient                       | 6.749 mm <sup>-1</sup>                                                                                                                                    |
| <i>F</i> (000)                               | 648                                                                                                                                                       |
| Theta range for data collection              | 2.41 to 24.99°                                                                                                                                            |
| Index ranges                                 | -10 ≤ <i>h</i> ≤ 10; -12 ≤ <i>k</i> ≤ 12; -15 ≤ <i>l</i> ≤ 14                                                                                             |
| Completeness to theta = 25.00°               | 97.7 %                                                                                                                                                    |
| Reflections collected                        | 6906                                                                                                                                                      |
| Independent reflections                      | 4069 [R(int) = 0.0404]                                                                                                                                    |
| Absorption correction                        | multi-scan                                                                                                                                                |
| Max. and min. transmission                   | 0.7458 and 0.4592                                                                                                                                         |
| Refinement method                            | Full-matrix least-squares on F <sup>2</sup>                                                                                                               |
| Data / restraints / parameters               | 4069 / 0 / 308                                                                                                                                            |
| Goodness-of-fit on F <sup>2</sup>            | 1.037                                                                                                                                                     |
| Final R indices [ <i>I</i> > 2σ( <i>I</i> )] | R1 = 0.0452, wR2 = 0.0918                                                                                                                                 |
| R indices (all data)                         | R1 = 0.0690, wR2 = 0.1022                                                                                                                                 |
| Largest diff. peak and hole                  | 0.823 and -0.668 e.Å <sup>-3</sup>                                                                                                                        |

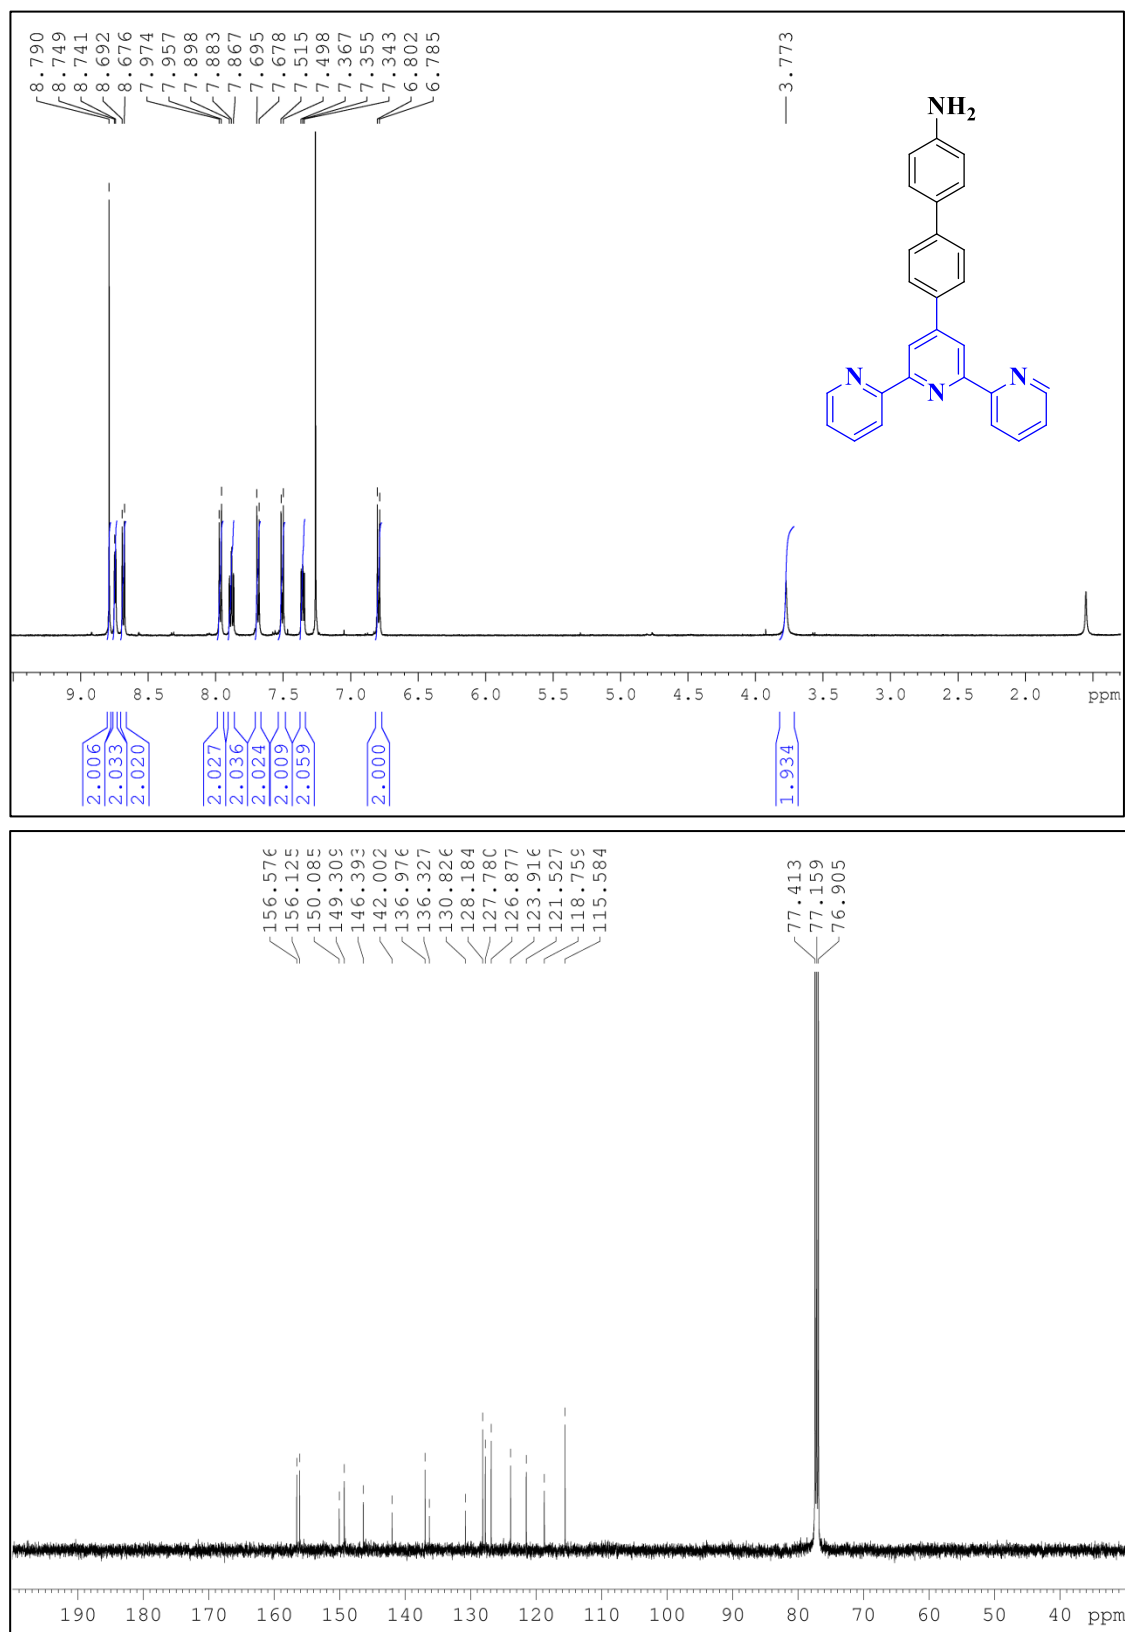

Fig. S3 <sup>1</sup>H NMR (top) and <sup>13</sup>C NMR (bottom) spectra of L in CDCl<sub>3</sub>.

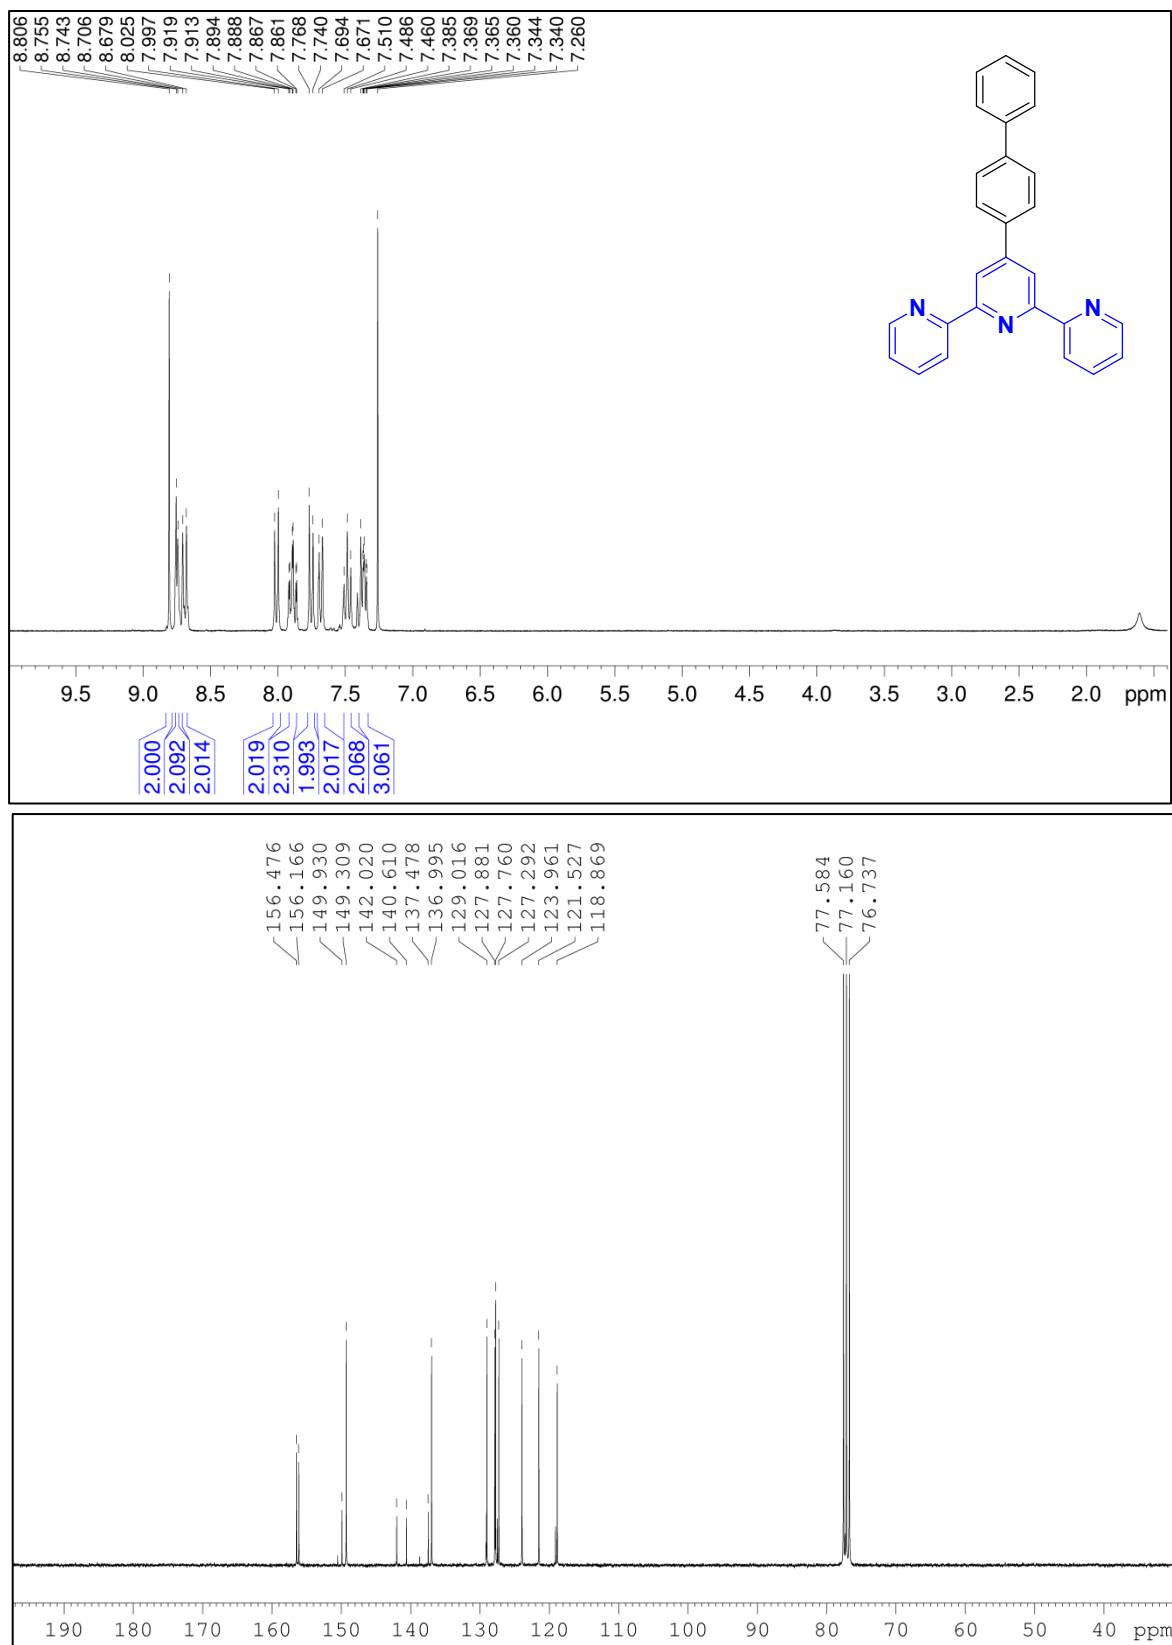

Fig. S4 <sup>1</sup>H NMR (top) and <sup>13</sup>C NMR (bottom) spectra of L1 in CDCl<sub>3</sub>.

## References

1. F. S. Han, M. Higuchi and D. G. Kurth, *Org. Lett.*, 2007, **9**, 559-562.
2. W. Goodall, K. Wild, K. J. Arm and J. A. G. Williams, *J. Chem. Soc., Perkin Trans. 2*, 2002, 1669-1681.
3. Z. Otwinowski and W. Minor, *Methods in Enzymology, Macromolecular Crystallography, Part A*, New York: Academic Press, 1997.
4. G. M. Sheldrick, *SADABS, Bruker Analytical X-ray system, Inc., Madison, Wisconsin*, 2008.
5. M. C. Burla, R. Caliendo, M. Camalli, B. Carrozzini, G. L. Casciarano, L. De Caro, C. Giacovazzo, G. Polidori and R. Spagna, *J. Appl. Cryst.*, 2005, **38**, 381-388.
6. L. Farrugia, *J. Appl. Cryst.*, 1999, **32**, 837-838.
7. G. Sheldrick, *Acta Cryst. A*, 2008, **64**, 112-122.
8. L. Farrugia, *J. Appl. Cryst.*, 2012, **45**, 849-854.
9. C. F. Macrae, I. J. Bruno, J. A. Chisholm, P. R. Edgington, P. McCabe, E. Pidcock, L. Rodriguez-Monge, R. Taylor, J. van de Streek and P. A. Wood, *J. Appl. Cryst.*, 2008, **41**, 466-470.
